# Supplementary material for: Emergence of Colistin and Carbapenem Resistance in Extended-Spectrum β-Lactamase Producing Klebsiella pneumoniae Isolated from Chickens and Humans in Egypt
Source: MDPI journal article supplement (doi:10.3390/biology10050373), 2021-04-26
Supplement: s1 [file s1]

**Table S1.** Oligonucleotide primer sequences used for PCR assays.

| Target Gene                       | Primer                                              | Oligonucleotide Sequence (5'→3')                   | Product Size (bp) <sup>§</sup> | Annealing Temperature (°C) | References |
|-----------------------------------|-----------------------------------------------------|----------------------------------------------------|--------------------------------|----------------------------|------------|
| <i>K. pneumoniae</i> 16S-23S ITS* | <i>K. pneumoniae</i> Pf<br><i>K. pneumoniae</i> Pr1 | ATTTGAAGAGGTTGCAAACGAT<br>TTCACCTCTGAAGTTTCTGTGTTC | 130                            | 57                         | [23]       |
| <i>bla</i> <sub>OXA-1</sub>       | OXA-F<br>OXA-R                                      | GGCACCAGATTCAACTTTCAAG<br>GACCCCAAGTTTCCTGTAAGTG   | 564                            | 61                         | [33]       |
| <i>bla</i> <sub>CTX-M1</sub>      | CTX-M-1-F<br>CTX-M-1-R                              | TTAGGAAGTGTGCCGCTGTA<br>CGGTTTTATCCCCACAAC         | 655                            |                            |            |
| <i>bla</i> <sub>SHV</sub>         | SHV-F<br>SHV-R                                      | AGCCGCTTGAGCAAATTAAC<br>ATCCCGCAGATAAATCACCAC      | 713                            |                            |            |
| <i>bla</i> <sub>TEM</sub>         | TEM-F<br>TEM-R                                      | CATTTCGCTGTCGCCCTTATTC<br>CGTTCATCCATAGTTGCCTGAC   | 800                            |                            |            |
| <i>bla</i> <sub>IMP</sub>         | IMP1-F<br>IMP1-R                                    | CATGGTTTGGTGGTTCTTGT<br>ATAATTTGGCGGACTTTGGC       | 488                            | 53                         | [34]       |
| <i>bla</i> <sub>VIM</sub>         | VIM-F<br>VIM-R                                      | AGTGGTGAGTATCCGACA<br>ATGAAAGTGCGTGAGAC            | 280                            | 52                         | [35]       |
| <i>bla</i> <sub>NDM1</sub>        | NDM-1-F<br>NDM-1-R                                  | GGCGGAATGGCTCATCACGA<br>CGCAACACAGCCTGACTTTC       | 287                            | 55                         | [36]       |
| <i>mcr-1</i>                      | CLR5-F<br>CLR5-R                                    | CGGTCAGTCCGTTTGTTT<br>CTTGCTCGGTCTGTAGGG           | 309                            | 55                         | [37]       |
| ERIC consensus                    | ERIC1R<br>ERIC2                                     | ATGTAAGCTCCTGGGGATTAC<br>AAGTAAGTGACTGGGGTGAGCG    | Variable                       | 52                         | [38]       |

\* ITS, Internal transcribed spacer; <sup>§</sup> bp, base pair.

**Table S2.** Frequency distribution of *K. pneumoniae* isolates recovered from broiler farms and human workers in the study area.

| Farms     | Chicken |       |      |        |        | TC     | Cw**   |
|-----------|---------|-------|------|--------|--------|--------|--------|
|           | C       | Ce*   |      |        | Total  |        |        |
|           |         | Water | Food | Litter |        |        |        |
| 1         | 2       | 1     | 0    | 1      | 2      | 4      | 1      |
| 2         | 0       | 0     | 0    | 0      | 0      | 0      | 0      |
| 3         | 3       | 2     | 1    | 1      | 4      | 7      | 2/3    |
| 4         | 1       | 1     | 0    | 0      | 1      | 2      | 1      |
| 5         | 1       | 0     | 0    | 1      | 1      | 2      | 0      |
| 6         | 1       | 0     | 0    | 1      | 1      | 2      | 1      |
| 7         | 0       | 0     | 0    | 0      | 0      | 0      | 0      |
| 8         | 0       | 0     | 0    | 0      | 0      | 0      | 0/3    |
| 9         | 0       | 0     | 0    | 0      | 0      | 0      | 0      |
| 10        | 1       | 0     | 0    | 1      | 1      | 2      | 0      |
| Total (%) | 9/100   | 4/20  | 1/20 | 5/20   | 10/60  | 19/160 | 5/22   |
|           | (9)     | (20)  | (5)  | (25)   | (16.7) | (11.9) | (22.7) |

C: diseased chicken; Ce: chicken environment samples; TC: total chicken samples.

\* Two pooled (a pool of three) samples for each type per farm; \*\* Cw: stool samples of chicken workers in broilers farms

**Table S3.** Source associated variations in phenotypic and genetic antibiotic resistance traits of *K. pneumoniae* isolates from chickens and humans in this study.

| Variables                   | Source                    | Positive | OR           | * <i>p</i> -Value | 95% CI |
|-----------------------------|---------------------------|----------|--------------|-------------------|--------|
| Carbapenemase encoding gene | <i>bla</i> <sub>VIM</sub> | Chicken  | 1/19 (5.3)   | -                 | -      |
|                             |                           | Human    | 12/18 (66.7) | 36                | 0.002  |
|                             | <i>bla</i> <sub>NDM</sub> | Chicken  | 2/19 (10.5)  | -                 | -      |
|                             |                           | Human    | 10/18 (55.6) | 10.6              | 0.01   |
| Phenotypic resistance       | Imipenem                  | Chicken  | 3/19 (15.8)  | -                 | -      |
|                             |                           | Human    | 14/18 (77.8) | 18.7              | 0.001  |
|                             | Gentamicin                | Chicken  | 5/19 (26.3)  | -                 | -      |
|                             |                           | Human    | 11/18 (61.1) | 4.4               | 0.04   |
|                             | Aztreonam                 | Chicken  | 4/19 (21.1)  | -                 | -      |
|                             |                           | Human    | 10/18 (55.6) | 4.7               | 0.04   |
|                             | Azithromycin              | Chicken  | 7/19 (36.8)  | -                 | -      |
|                             |                           | Human    | 17/18 (94.4) | 29.1              | 0.003  |

\* There was no significant association with regard to other antibiotic resistance genes or tested antimicrobials among the detected isolates. OR: Odds ration; CI: Confidence interval. *p*-value is considered significant at ≤0.05.

## References

23. Liu, Y.; Liu, C.; Zheng, W.; Zhang, X.; Yu, J.; Gao, Q.; Hou, Y.; Huang, X. PCR detection of *Klebsiella pneumoniae* in infant formula based on 16S-23S internal transcribed spacer. *Int. J. Food Microbiol.* **2008**, *125*, 230–235, doi:10.1016/j.ijfoodmicro.2008.03.005.
33. Ogutu, J.O.; Zhang, Q.; Huang, Y.; Yan, H.; Su, L.; Gao, B.; Zhang, W.; Zhao, J.; Cai, W.; Li, W.; et al. Development of a multiplex PCR system and its application in detection of *bla*<sub>SHV</sub>, *bla*<sub>TEM</sub>, *bla*<sub>CTX-M-1</sub>, *bla*<sub>CTX-M-9</sub> and *bla*<sub>OXA-1</sub> group genes in clinical *Klebsiella pneumoniae* and *Escherichia coli* strains. *J. Antibiot. (Tokyo)*. **2015**, *68*, 725–733, doi:10.1038/ja.2015.68.
34. Qi, C.; Malczynski, M.; Parker, M.; Scheetz, M.H. Characterization of genetic diversity of carbapenem-resistant *Acinetobacter baumannii* clinical strains collected from 2004 to 2007. *J. Clin. Microbiol.* **2008**, *46*, 1106–1109, doi:10.1128/JCM.01877-07.
35. Xia, Y.; Liang, Z.; Su, X.; Xiong, Y. Characterization of carbapenemase genes in *Enterobacteriaceae* species exhibiting decreased susceptibility to carbapenems in a university hospital in Chongqing, China. *Ann. Lab. Med.* **2012**, *32*, 270–275, doi:10.3343/alm.2012.32.4.270.
36. Yong, D.; Toleman, M.A.; Giske, C.G.; Cho, H.S.; Sundman, K.; Lee, K.; Walsh, T.R. Characterization of a new metallo- $\beta$ -lactamase gene, *bla*<sub>NDM-1</sub>, and a novel erythromycin esterase gene carried on a unique genetic structure in *Klebsiella pneumoniae* sequence type 14 from India. *Antimicrob. Agents Chemother.* **2009**, *53*, 5046–5054, doi:10.1128/AAC.00774-09.
37. Liu, Y.Y.; Wang, Y.; Walsh, T.R.; Yi, L.X.; Zhang, R.; Spencer, J.; Doi, Y.; Tian, G.; Dong, B.; Huang, X.; et al. Emergence of plasmid-mediated colistin resistance mechanism MCR-1 in animals and human beings in China: A microbiological and molecular biological study. *Lancet Infect. Dis.* **2016**, *16*, 161–168, doi:10.1016/S1473-3099(15)00424-7.
38. Versalovic, J.; Koeuth, T.; Lupski, R. Distribution of repetitive DNA sequences in eubacteria and application to fingerprinting of bacterial genomes. *Nucleic Acids Res.* **1991**, *19*, 6823–6831, doi:10.1093/nar/19.24.6823.
